# Supplementary material
Source: publisher site journal article supplement (https://www.dovepress.com/article/335588)
Supplement: Supplementary file 1 [file get_supplementary_file.php]

**Supplementary Methods**

**Title: Emodin-conjugated PEGylation of Fe3O4 Nanoparticles for FI/MRI dual-modal imaging and therapy in pancreatic cancer**

*Shuai Ren*, Lina Song, Ying Tian, Li Zhu, Kai Guo, Huifeng Zhang, Zhongqiu Wang**

Department of Radiology, Jiangsu Province Hospital of Chinese Medicine, Affiliated Hospital of Nanjing University of Chinese Medicine, Nanjing, Jiangsu Province, China 210029

**S1.1. Calculate the number of Fe3O4-PEG-Cy7-EMO nanoparticles and the surface area of Fe3O4-PEG-Cy7-EMO nanoparticles**

The number of Fe3O4-PEG-Cy7-EMO nanoparticles was measured and calculated as follows:

m1 =π ()3

=

=

The surface area of Fe3O4-PEG-Cy7-EMO nanoparticle was measured and calculated as follows:

S1 = πD2

= S1

Where 𝑚1 represents the weight of one Fe3O4 nanoparticle, is the density of the Fe3O4. and m2 represent the total weight of Fe3O4 nanoparticles and Fe in 1 mL solution; S1 represents the superficial area of one Fe3O4 nanoparticle, represents the total superficial area of Fe3O4 nanoparticle in 1 mL solution.

**S1.2. Calculate the conjugation efficacy of EMO to Fe3O4-PEG-Cy7-EMO nanoparticles**

The conjugation efficacy of EMO to Fe3O4-PEG-Cy7-EMO nanoparticles was measured and calculated as follows:

=

NEMO =

represents the total amount of EMO in 1 mL solution, NEMO represents the conjugation efficacy of EMO to Fe3O4-PEG-Cy7-EMO nanoparticle.

**Supplementary Results**

**S2.1. Calculation of Fe3O4-PEG-Cy7-EMO nanoparticles number and the surface area of Fe3O4-PEG-Cy7-EMO nanoparticles**

The number of Fe3O4-PEG-Cy7-EMO nanoparticles was measured and calculated as follows:

m1 =π ()3= π(4.9510-7cm)35.18g/cm3 = 2.6310-18g

== = 1.38mg

== = = 0.521015

The surface area of Fe3O4-PEG-Cy7-EMO nanoparticle was measured and calculated as follows:

S1 = πD2 = π

= S1= 0.5210151.61017nm2

Where 𝑚1 represents the weight of one Fe3O4 nanoparticle, is the density of the Fe3O4. and m2 represent the total weight of Fe3O4 nanoparticles and Fe in 1 mL solution; S1 represents the superficial area of one Fe3O4 nanoparticle, represents the total superficial area of Fe3O4 nanoparticle in 1 mL solution.

**S2.2. Calculation of the conjugation efficacy of EMO to Fe3O4-PEG-Cy7-EMO nanoparticles**

The conjugation efficacy of EMO to Fe3O4-PEG-Cy7-EMO nanoparticles was measured and calculated as follows:

= 6.02= 2.681020

NEMO = 1675/nm2

represents the total amount of EMO in 1 mL solution, NEMO represents the conjugation efficacy of EMO to Fe3O4-PEG-Cy7-EMO nanoparticle.

**Supplementary Table 1**

The hemolysis experiments in vitro

| Tube No. | 1 | 2 | 3 | 4 | 5 |
| --- | --- | --- | --- | --- | --- |
| 2% RBC suspension (mL) | 2.5 | 2.5 | 2.5 | 2.5 | 2.5 |
| sterile saline (mL) | 2.45 | 2.45 | 2.4 | 2.5 | / |
| distilled water | / | / | / | / | 2.5 |
| reagent (mL, 1mg/mL) | 0.05 | 0.05 | 0.1 | / | / |
| 15 min | - | - | - | - | + |
| 30 min | - | - | - | - | + |
| 45 min | - | - | - | - | + |
| 1 h | - | - | - | - | + |
| 2 h | - | - | - | - | + |
| 4 h | - | - | - | - | + |

Notes: RBC, red blood cells.
